# Supplementary material for: Bacterial-Chromatin Structural Proteins Regulate the Bimodal Expression of the Locus of Enterocyte Effacement (LEE) Pathogenicity Island in Enteropathogenic Escherichia coli
Source: PubMed Central journal article supplement (PMC5550750; doi:10.1128/mbio.00773-17), 2017-08-08
Supplement: mbo004173419sf1.pdf [file mbo004173419sf1.pdf]

**Figure S1: Medium effect on a phage promoter activity in WT, Ler or H-NS-deficient EPEC strains**

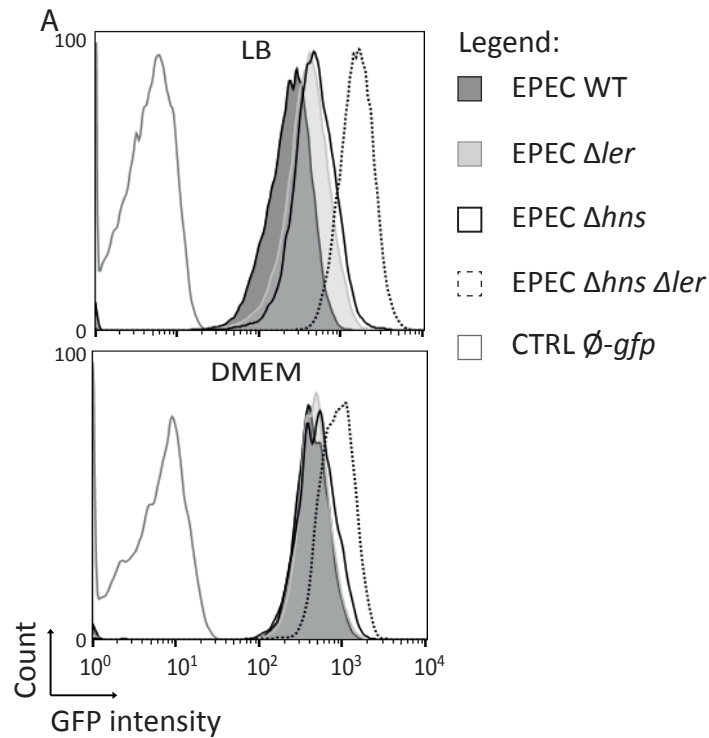

**Doubling time and ratio of maximal density reached in stationary phase of EPEC strains used this study after growth in Glc-CAA-M9 medium**

| Strain                       | Maximal doubling time during exponential growth in 96-well plate reader (min) ( $\pm$ standard deviation, $n = 12$ ) | Ratio of optical density measured in stationary phase after growth in 96-well plate reader (over the WT strain, $n=12$ ) | Ratio of optical density measured in stationary phase after growth in 15 mL conical tube (over the WT strain, $n=12$ ) |
|------------------------------|----------------------------------------------------------------------------------------------------------------------|--------------------------------------------------------------------------------------------------------------------------|------------------------------------------------------------------------------------------------------------------------|
| EPEC WT                      | 30.8 ( $\pm$ 2.2)                                                                                                    | 1                                                                                                                        | 1                                                                                                                      |
| EPEC $\Delta ler$            | 33.2 ( $\pm$ 4.3)                                                                                                    | 1.1 ( $\pm$ 0.1)                                                                                                         | 1.0 ( $\pm$ 0.1)                                                                                                       |
| EPEC $\Delta hns$            | 41.1 ( $\pm$ 5.9)                                                                                                    | 1.6 ( $\pm$ 0.3)                                                                                                         | 1.4 ( $\pm$ 0.2)                                                                                                       |
| EPEC $\Delta ler \Delta hns$ | 55.0 ( $\pm$ 8.6)                                                                                                    | 2.1 ( $\pm$ 0.9)                                                                                                         | 1.7 ( $\pm$ 0.5)                                                                                                       |
