# Supplementary material for: Bacterial-Chromatin Structural Proteins Regulate the Bimodal Expression of the Locus of Enterocyte Effacement (LEE) Pathogenicity Island in Enteropathogenic Escherichia coli
Source: PubMed Central journal article supplement (PMC5550750; doi:10.1128/mbio.00773-17), 2017-08-08

Figure S2: Kinetic of fluorescence decline by dilution by cell division

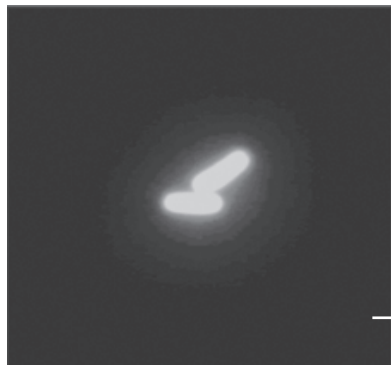

5 generations

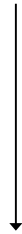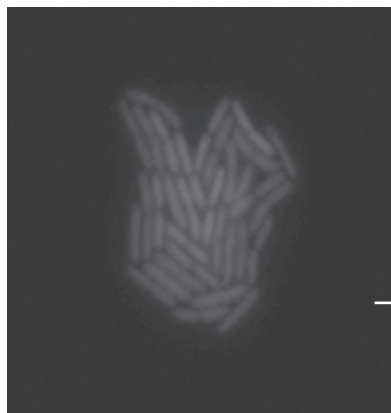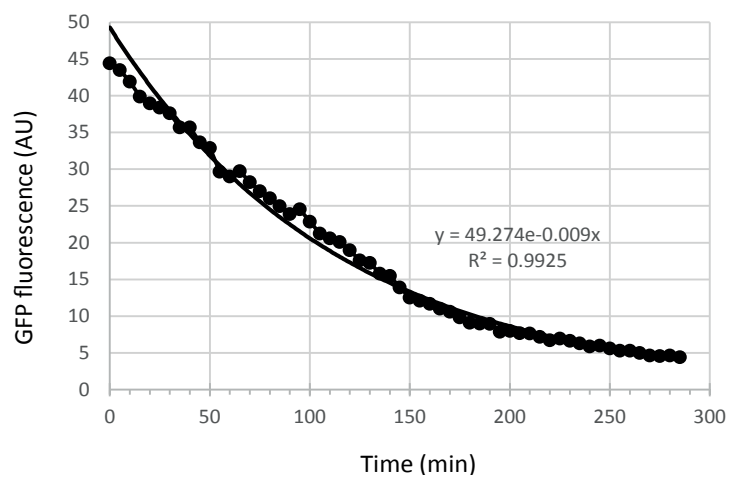

Supplement: mbo004173419sf2.pdf [file mbo004173419sf2.pdf]
