# Supplementary material for: Bacterial-Chromatin Structural Proteins Regulate the Bimodal Expression of the Locus of Enterocyte Effacement (LEE) Pathogenicity Island in Enteropathogenic Escherichia coli
Source: PubMed Central journal article supplement (PMC5550750; doi:10.1128/mbio.00773-17), 2017-08-08

**Figure S3: Variation of *LEE5* expression pattern depending on the medium and growth phase of inoculating overnight culture**

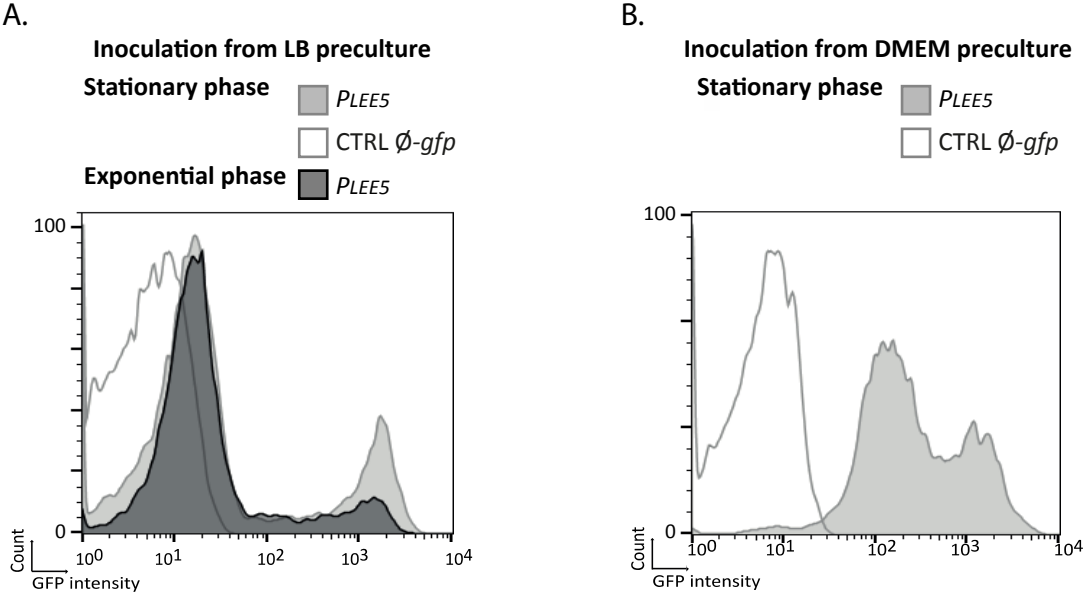

Supplement: mbo004173419sf3.pdf [file mbo004173419sf3.pdf]
