# Supplementary material for: Bacterial-Chromatin Structural Proteins Regulate the Bimodal Expression of the Locus of Enterocyte Effacement (LEE) Pathogenicity Island in Enteropathogenic Escherichia coli
Source: PubMed Central journal article supplement (PMC5550750; doi:10.1128/mbio.00773-17), 2017-08-08

Figure S8: Competitive growth experiment between EPEC WT and  $\Delta$ er strains

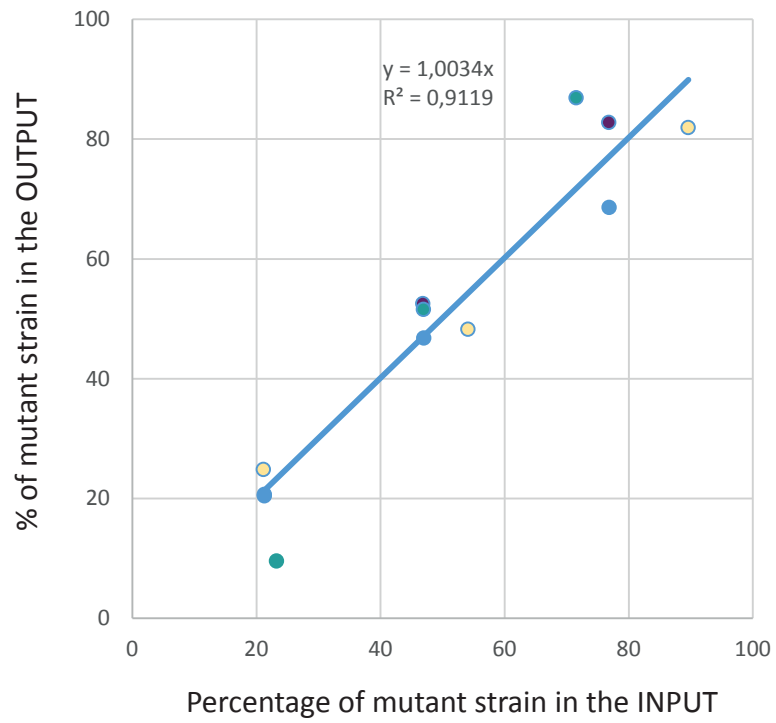

Supplement: mbo004173419sf8.pdf [file mbo004173419sf8.pdf]
