# Supplementary material for: Bacterial-Chromatin Structural Proteins Regulate the Bimodal Expression of the Locus of Enterocyte Effacement (LEE) Pathogenicity Island in Enteropathogenic Escherichia coli
Source: PubMed Central journal article supplement (PMC5550750; doi:10.1128/mbio.00773-17), 2017-08-08
Supplement: mbo004173419st1.pdf [file mbo004173419st1.pdf]

**Table S1: Strains and plasmids used in the present study**

| Name                                           | Details                                                                                                                                                                         | Reference or Source    |
|------------------------------------------------|---------------------------------------------------------------------------------------------------------------------------------------------------------------------------------|------------------------|
| <b>Bacterial plasmids</b>                      |                                                                                                                                                                                 |                        |
| pET <i>ler his6</i>                            | Expression vector of the Ler <sub>his6</sub> protein                                                                                                                            | This study             |
| pGEM-T-easy Prom <i>LEE5</i>                   | pGEM-T with Prom <i>LEE5</i> (-250, +270) promoter region                                                                                                                       | This study             |
| pKK- <i>gfp</i>                                | Derived from the pKK plasmid with promoter-less <i>gfpmut2</i> reporter fusion vector                                                                                           | (1)                    |
| pKK-Prom <i>LEE5-gfp</i>                       | Prom <i>LEE5</i> <i>gfp</i> reporter fusion vector                                                                                                                              | This study             |
| pKK-Prom <i>LEE5-3M-gfp</i>                    | Prom <i>LEE5-3M</i> <i>gfp</i> reporter fusion vector                                                                                                                           | This study             |
| pMK-RQ-Prom <i>LEE5-3M</i>                     | Derived from pMK-RQ containing the Prom <i>LEE5</i> (-250, +270) sequence with the 3 disrupted H-NS binding sites                                                               | Geneart                |
| pKK-Prom <i>P2-gfp</i>                         | T5 phage <i>P2</i> promoter <i>gfp</i> reporter fusion vector ( <i>P2</i> sequence: GAGTCTGCTAATTAAACCTGAAAACTCATTAGGTAGTTTGC TAATGGTTTTGATATAATATAATAGAGATTAATAATAACAT AAGGA)  | Scavi's lab collection |
| pZA31-MCSp                                     | pZ vector composed of LtetO-1 promoter (repressed by TetR repressor, induced by the addition of anhydrotetracycline), p15A replication origin and resistance to chloramphenicol | (2)                    |
| pZA31- <i>ler</i>                              | pZA31-MCSp vector containing <i>ler</i> gene cloned between <i>KpnI</i> - <i>Bam</i> HI sites                                                                                   | This study             |
| <b>Bacterial strains</b>                       |                                                                                                                                                                                 |                        |
| JM109                                          |                                                                                                                                                                                 | Promega                |
| BL21 (DE3) <i>pLysS</i>                        | Production of Ler <sub>his6</sub>                                                                                                                                               | Stratagene             |
| <i>E. coli</i> MRE600                          | Production of native H-NS                                                                                                                                                       | Laboratory collection  |
| EPEC WT                                        | EPEC E2348/69 <i>wt</i> , Streptomycine <sup>R</sup>                                                                                                                            | (3)                    |
| EPEC $\Delta$ <i>ler</i>                       | EPEC E2348/69 DF2 <i>ler::kan</i>                                                                                                                                               | (3)                    |
| EPEC $\Delta$ <i>hns</i>                       | EPEC E2348/69 DF3 <i>hns::kan</i>                                                                                                                                               | (3)                    |
| EPEC $\Delta$ <i>ler</i> $\Delta$ <i>hns</i>   | EPEC E2348/69 TU1 <i>ler::kan hns::cat</i>                                                                                                                                      | (4)                    |
| EPEC $\Delta$ <i>grlA</i>                      | EPEC E2348/69 JPEP25 $\Delta$ <i>grlA::kan</i>                                                                                                                                  | (5)                    |
| EPEC $\Delta$ <i>perA</i>                      | EPEC E2348/69 JPEP20 $\Delta$ <i>perA::kan</i>                                                                                                                                  | (5)                    |
| EPEC $\Delta$ <i>perC</i>                      | EPEC E2348/69 JPEP22 $\Delta$ <i>perC::kan</i>                                                                                                                                  | (5)                    |
| EPEC $\Delta$ <i>grlA</i> $\Delta$ <i>perC</i> | EPEC E2348/69 JPEP26 $\Delta$ <i>perC::kan</i> $\Delta$ <i>grlA</i>                                                                                                             | (5)                    |
| MG1655Z1 WT                                    | MG1655 containing the Z1 locus (encoding the TetR repressor                                                                                                                     | (6)                    |

|                       |                                                                                      |            |
|-----------------------|--------------------------------------------------------------------------------------|------------|
| MG1655Z1 $\Delta hns$ | and resistance to spectinomycin – see (2)) inserted at <i>att</i> $\lambda$ site     | This study |
|                       | MG1655 <i>hns::kan</i> containing the Z1 locus inserted at <i>att</i> $\lambda$ site |            |

## References

1. Bouffartigues E, Buckle M, Badaut C, Travers A, Rimsky S. 2007. *Nature Structural & Molecular Biology* 14: 441–448.
2. Lutz R, Bujard H. 1997. *Nucleic Acids Res* 25:1203-10.
3. Friedberg D, Umanski T, Fang Y, Rosenshine I. 1999. *Mol Microbiol* 34:941-52.
4. Umanski T, Rosenshine I, Friedberg D. 2002. *Microbiology* 148:2735-44.
5. Bustamante VH, Villalba MI, Garcia-Angulo VA, Vazquez A, Martinez LC, Jimenez R, Puente JL. 2011. *Mol Microbiol* 82:398-415.
6. Bohn C, Collier J, Bouloc P. 2004. *Mol Microbiol* 52:427-35.
