# Supplementary material for: Bacterial-Chromatin Structural Proteins Regulate the Bimodal Expression of the Locus of Enterocyte Effacement (LEE) Pathogenicity Island in Enteropathogenic Escherichia coli
Source: PubMed Central journal article supplement (PMC5550750; doi:10.1128/mbio.00773-17), 2017-08-08
Supplement: mbo004173419st2.pdf [file mbo004173419st2.pdf]

**Table S2: Primers used in the present study**

| <b>Name</b>                      | <b>Sequence (5' - 3')</b>  |
|----------------------------------|----------------------------|
| proLEE5 S                        | CGCCCGGGCTGTAGGGGAACTTAC   |
| proLEE5 R                        | TCTCTAGAATCGACAGAATCAGCC   |
| proLEE1 S                        | CGCCCGGGATTCACTCGCTTGCCGCC |
| proLEE1 R                        | CGTCTAGAACTTCCTGCTCTCGCAG  |
| proLEE5 S4                       | GCGCTGTTATTTTTTTCTTG       |
| proLEE5 RII                      | CAAGGTTACCAATAGGCATAC      |
| Pro LEE5 SVI                     | TTTAGTTGAAATACAGACAT       |
| Ler F3                           | GCATATGAATATGGAACTAAT      |
| Ler R3                           | CCTCGAGAATATTTTTTCAGCGGTAT |
| <i>Primers used for RT-qPCR:</i> |                            |
| dnaQ-F                           | GTGCCGTTGAAGTGGTGAAC       |
| dnaQ-R                           | GAACTCATCGGCTACCTCGG       |
| gapA-F                           | CGTTGTCGCTGAAGCAACTG       |
| gapA-R                           | AGCGTTGAAACGATGTCCT        |
| gfp-F                            | ACGGCCACAAGTTCTCTGTC       |
| gfp-R                            | TAGTGTTGGCCATGGAACAG       |
| ler-F                            | GAGAGCAGGAAGTTCAAAGTGTA    |
| ler-R                            | AACACCTTTTCGATGAGTCCG      |
| rpoB-F                           | TATCCGTTCCGTTGGCGAAA       |
| rpoB-R                           | TGGCTGGAACCGAAGAACTC       |
| tir-F                            | TCCTACAAACCCATCGAGGC       |
| tir-R                            | ACCATCTGCCTGCACTTCAA       |
